# Supplementary material for: Effect of Long-Term Mesalamine Therapy on Cancer-Associated Gene Expression in Colonic Mucosa of Patients with Ulcerative Colitis
Source: Springer Nature journal article supplement (doi:10.1007/s10620-018-5378-8), 2018-11-26

**Fig S1:** The most affected molecular and cellular biological functions in our data sets and the diseases relevant to such modifications based on the pathway analysis algorithm of IPA.


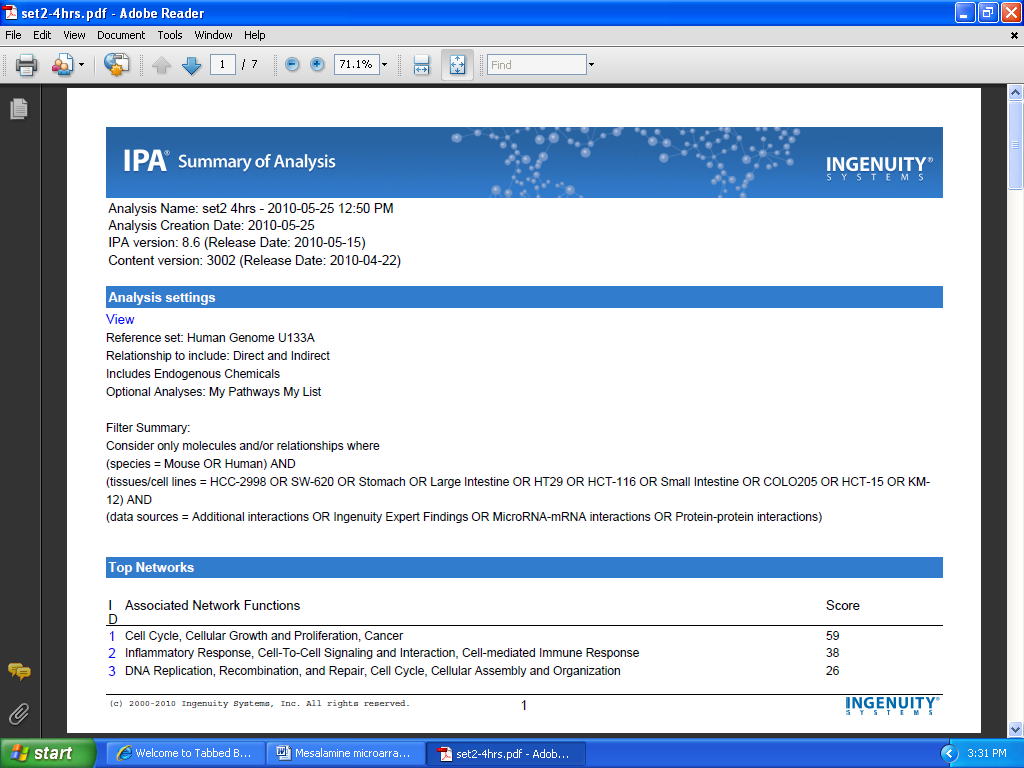


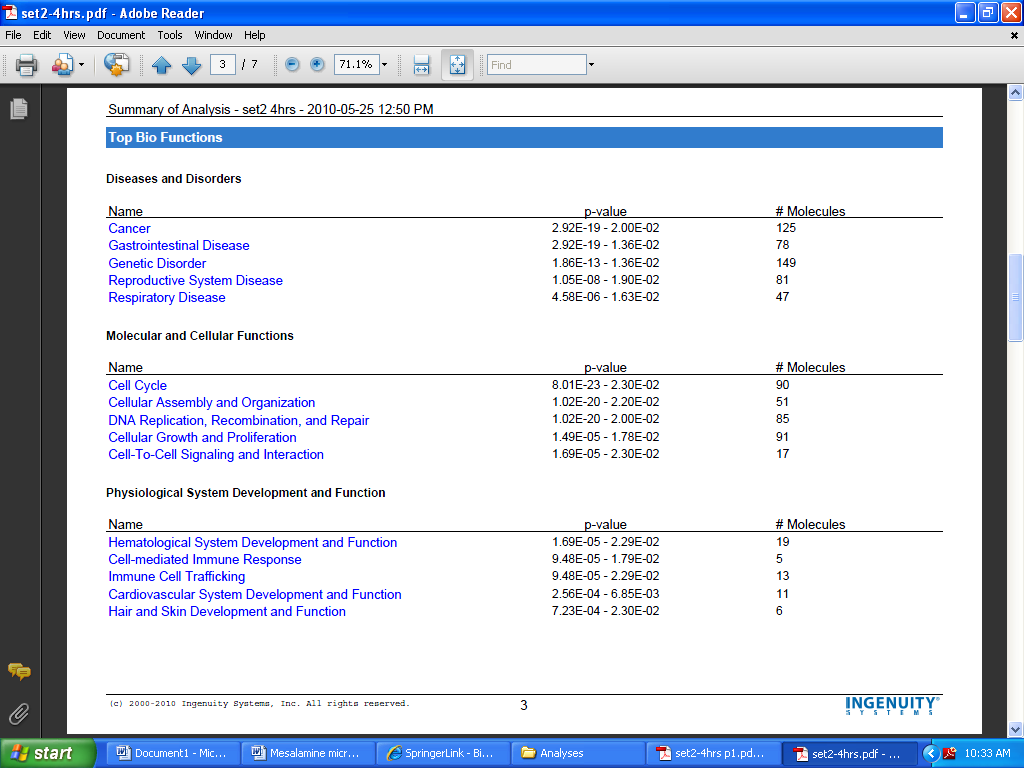


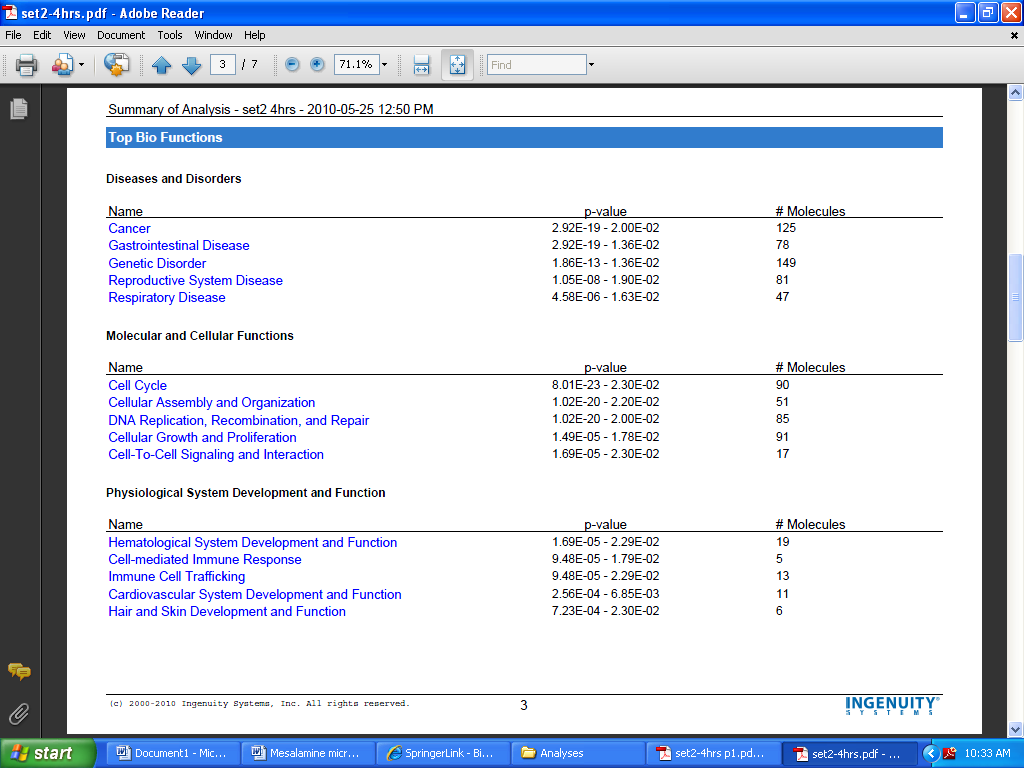


***S2A
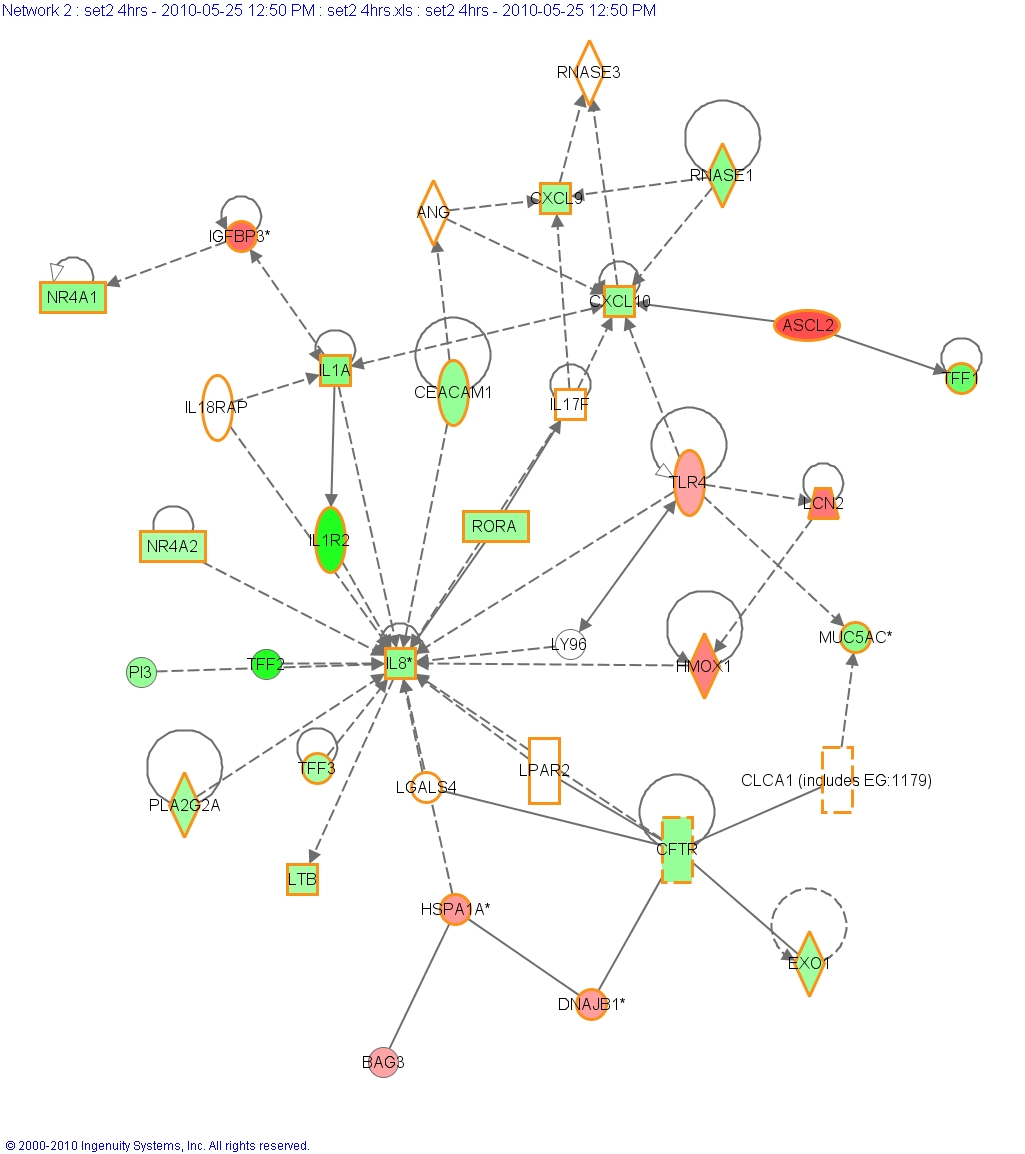
***
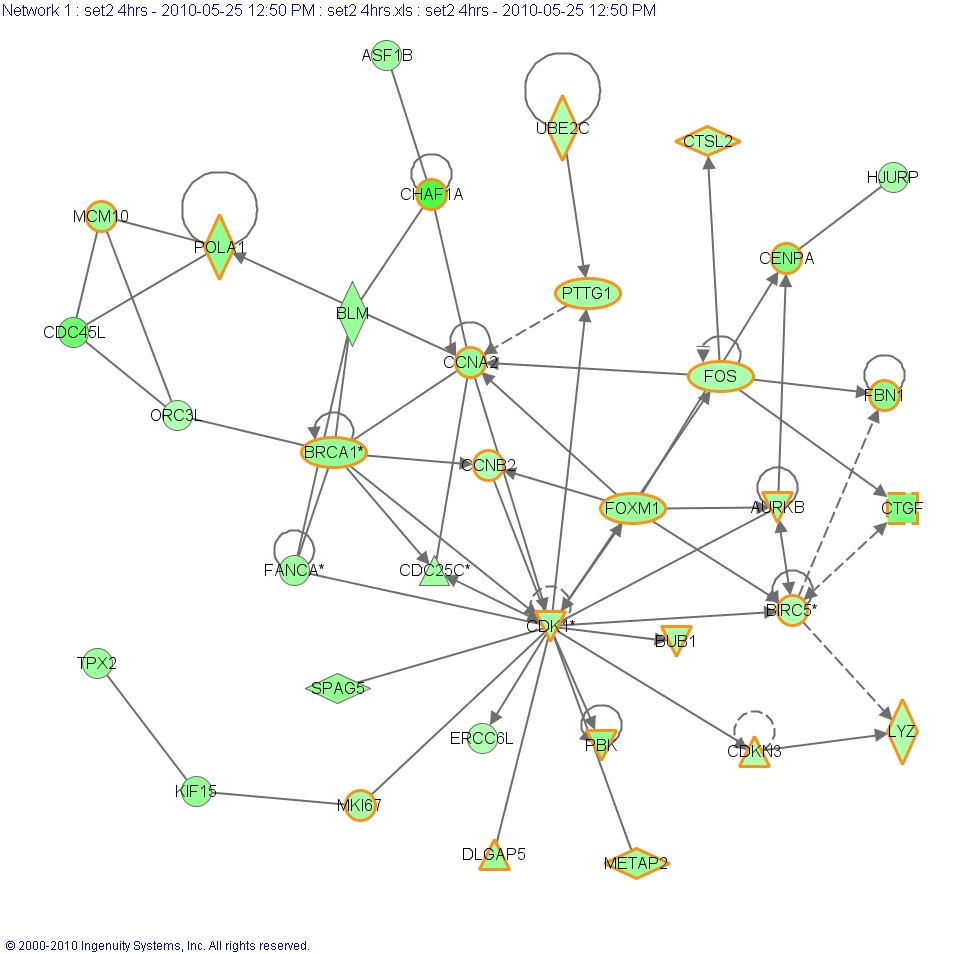


**S2B**

**Fig S2:** show the most functionally relevant (carcinogenesis and cell cycle regulation) interaction networks generated by *Ingenuity Pathway Analysis.* The analysis used molecular targets modulated by Mesalamine at 4 hrs based on the genome wide microarray data. Molecules that were up regulated are colored red, those down regulated are green. The unfilled shapes are molecules that either did not change in our array or have been introduced by the IPA knowledge base due to known interactions with the existing molecules. Those molecules implicated in cancer (2A) and those in Cell-cycle regulation (2B) are highlighted in yellow.

**Fig S3:** The pathway analysis algorithm of IPA identifies the most affected canonical pathways and the molecules based on the analyzed dataset. The four pathways suggested engage in biological functions relevant to cell cycle regulation and carcinogenesis.


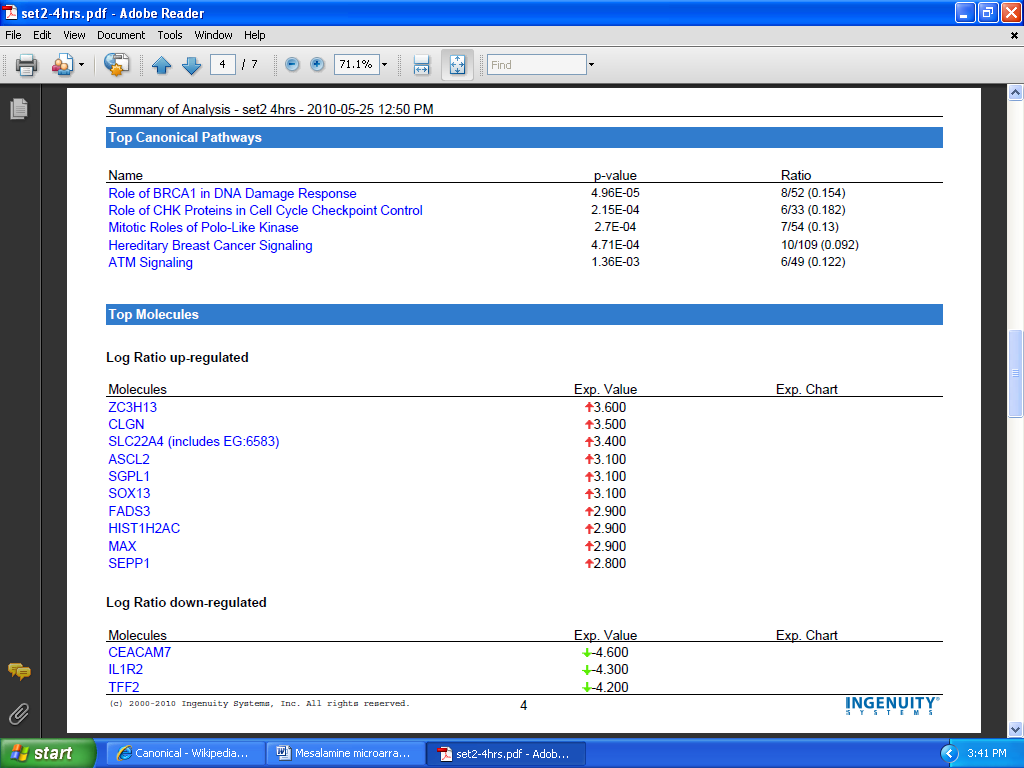


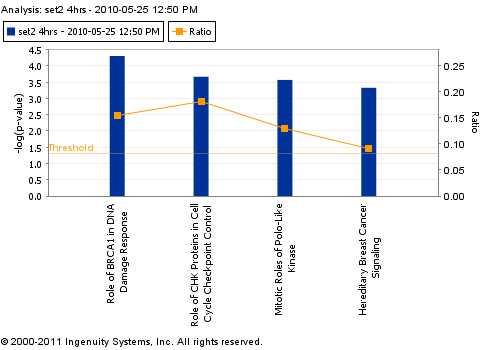

Supplement: MOESM1 [file 16295292]
